# Supplementary material for: KEAP1 mutation in lung adenocarcinoma promotes immune evasion and immunotherapy resistance
Source: PubMed Central journal article supplement — Cell Rep. Author manuscript; Available in PMC 2023 Dec 29. (PMC10755970; doi:10.1016/j.celrep.2023.113295), 2023-10-26
Supplement: NIHMS1948174-supplement-1.pdf [file NIHMS1948174-supplement-1.pdf]

**Supplemental information**

***KEAP1* mutation in lung adenocarcinoma promotes  
immune evasion and immunotherapy resistance**

Anastasia-Maria Zavitsanou, Ray Pillai, Yuan Hao, Warren L. Wu, Eric Bartnicki, Triantafyllia Karakousi, Sahith Rajalingam, Alberto Herrera, Angeliki Karatza, Ali Rashidfarrokhi, Sabrina Solis, Metamia Ciampricotti, Anna H. Yeaton, Ellie Ivanova, Corrin A. Wohlhieter, Terkild B. Buus, Makiko Hayashi, Burcu Karadal-Ferrena, Harvey I. Pass, John T. Poirier, Charles M. Rudin, Kwok-Kin Wong, Andre L. Moreira, Kamal M. Khanna, Aristotelis Tsirigos, Thales Papagiannakopoulos, and Sergei B. Koralov

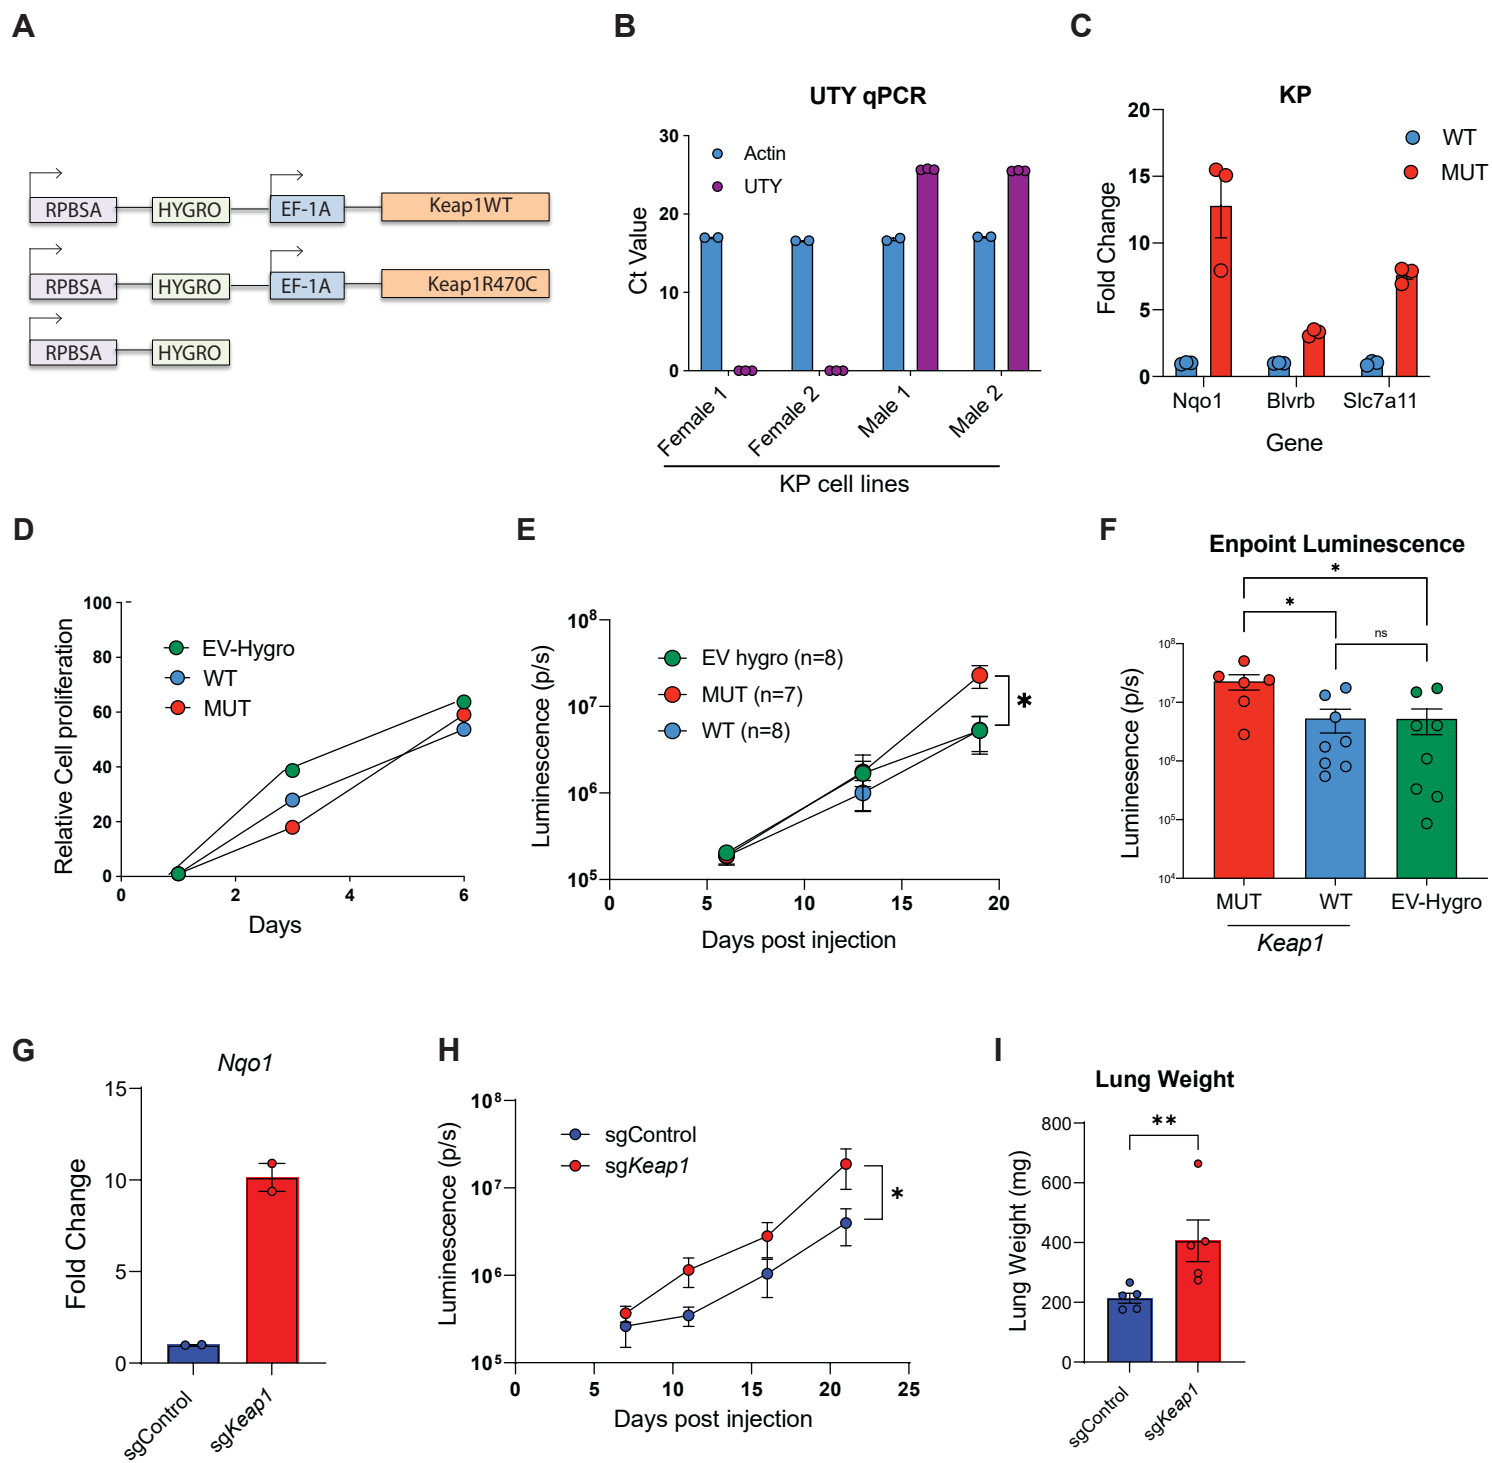

Fig. S1

**Supplementary Fig 1: Impact of *Keap1* genetic inactivation on tumor growth in mouse models of LUAD.**

(A) Schematic of vectors overexpressing wild-type or mutant *Keap1* and empty vector control used to modify cell lines in the orthotopic LUAD model. (B) Gene expression of *Uty* in KP cell lines isolated from female or male animals. KP cell line male 2 was selected for subsequent experiments (C) Gene expression of Nrf2 target genes in KP cells overexpressing wild-type (WT) or mutant (MUT) *Keap1*. (D) *In vitro* proliferation analysis of KP cell lines transduced with vectors shown in A reveals no difference in growth kinetics. (EV: empty vector) (E) Growth kinetics analysis of KP cells expressing *Keap1* wild-type, mutant or empty vector control in C57BL/6J female hosts as measured by bioluminescence reveals increased proliferation by *Keap1*-mutant cells (F) Endpoint luminescence of a representative experiment outlined in E. (G) QPCR showing *Nqo1* expression of *Keap1* knockout (*sgKeap1*) cell lines *in vitro* relative to controls. (H) Growth of *sgKeap1* KP cells and controls *in vivo* after IV injection into female C57BL/6J mice as measured by bioluminescence. (I) Weight of tumor bearing lungs from mice in H on day 21. \*P<0.05; \*\*P<0.01

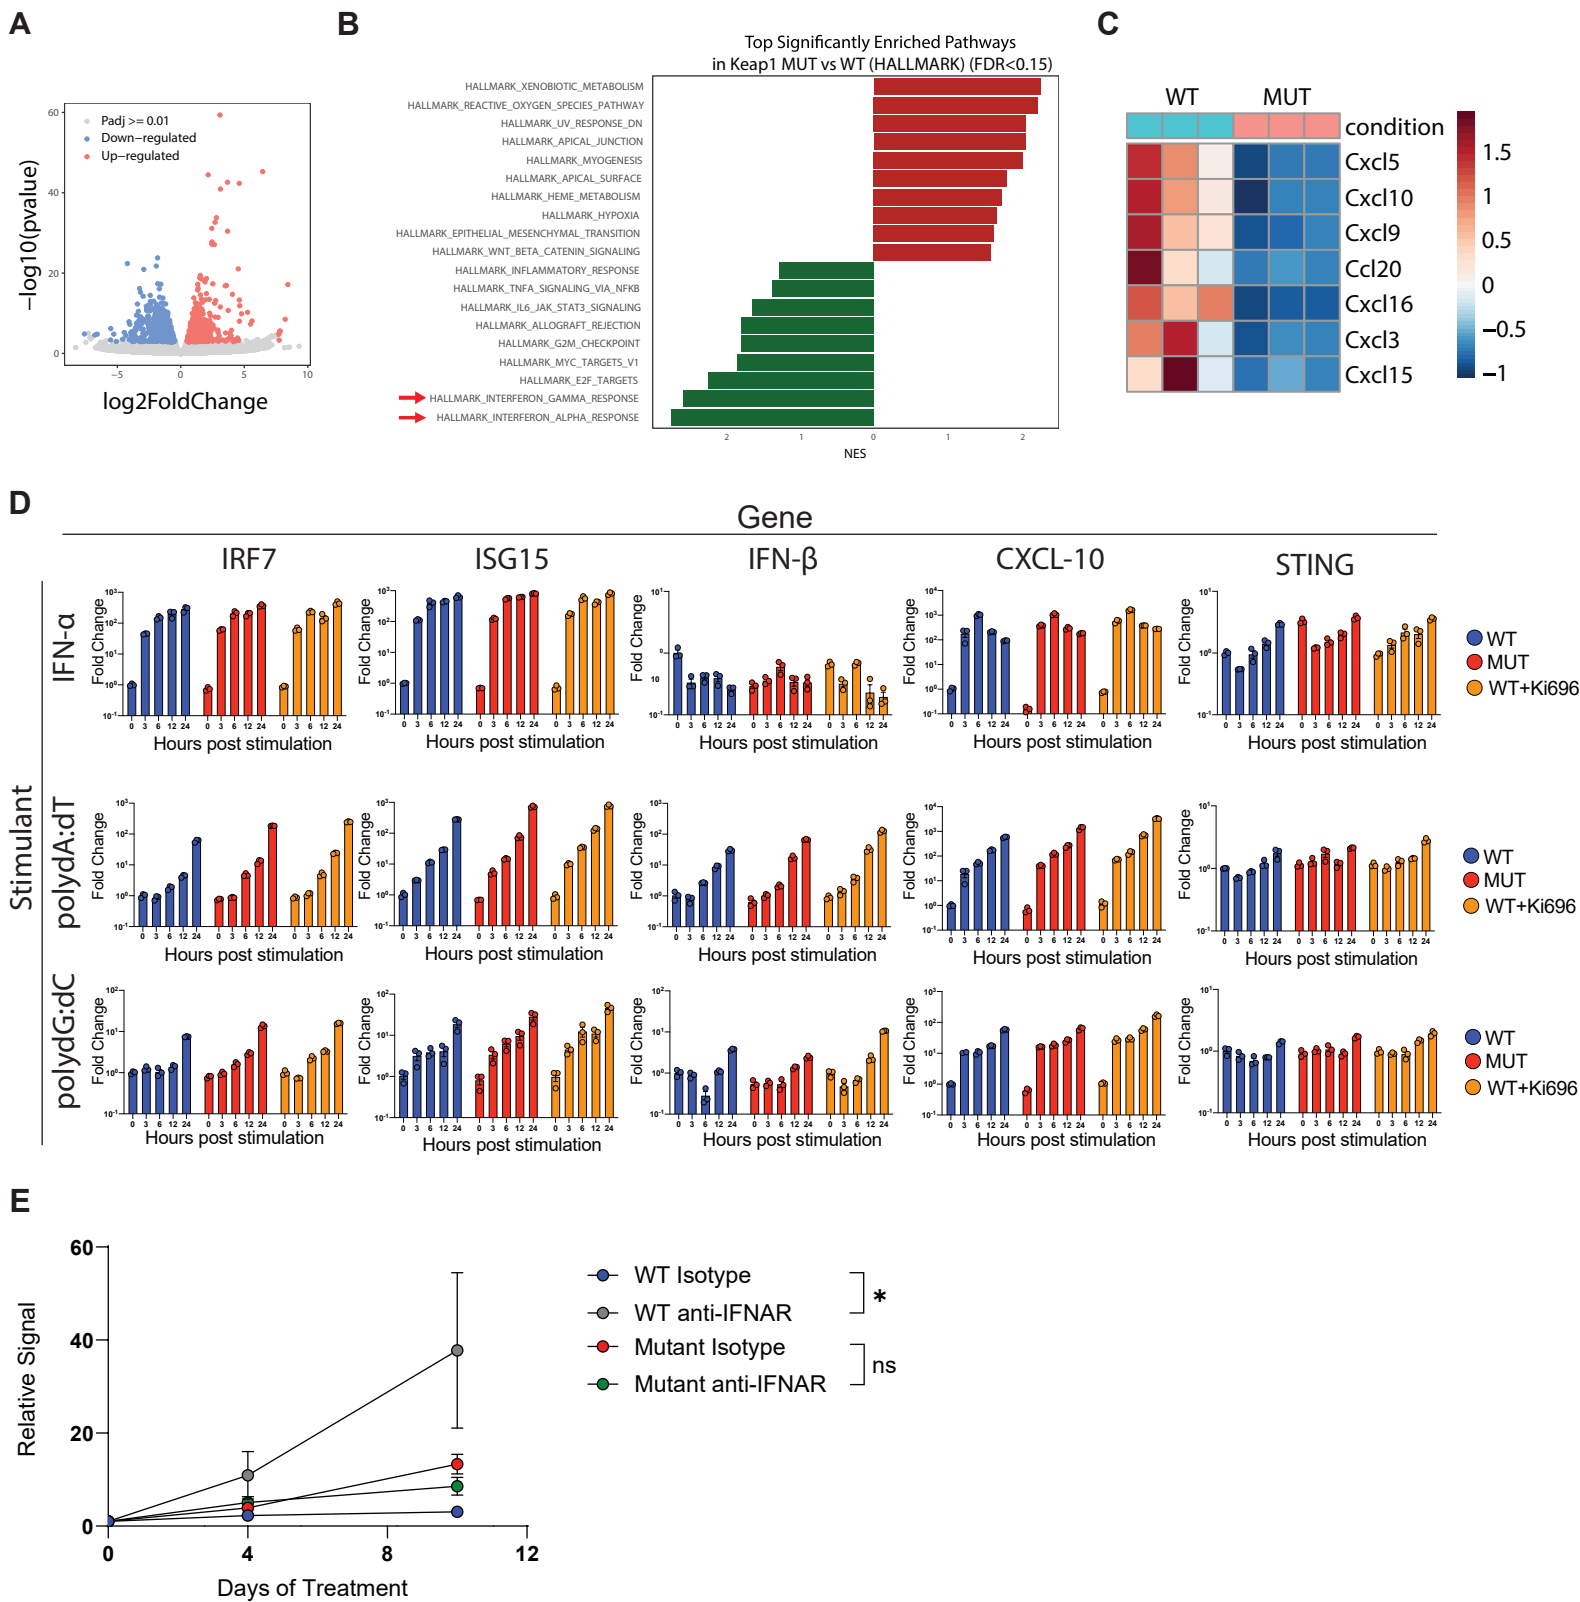

Fig. S2

**Supplementary Fig 2: *Keap1*-mutant tumors have reduced interferon signaling *in vivo*.**

(A) RNA-seq was performed on sorted *Keap1*-mutant and wildtype tumors. Volcano plot showing differentially expressed genes in mutant tumors vs wildtype tumors. (B) Most significantly enriched or depleted pathways (FDR <0.15) in *Keap1*-mutant (MUT) compared to wild-type (WT) tumor cells isolated via sorting from tumor-bearing female hosts and subjected to RNA-seq. (C) Gene expression heatmap of chemokines significantly ( $p < 0.05$ ) altered between *Keap1*-mutant and wild-type tumors. (D) *Keap1*-mutant, *Keap1*-wildtype, or *Keap1*-wildtype + Ki696 treated tumor cells were stimulated with either IFN- $\alpha$ , polydA:dT, or polyG:dC *in vitro*. QPCR was performed looking at relative expression of specified gene targets at the indicated timepoints. (E) Growth kinetics of *Keap1*-mutant and wildtype tumors as measured by bioluminescence in C57BL/6J female mice after treatment with either anti-IFNAR antibody or isotype control. \* $P < 0.05$

**A**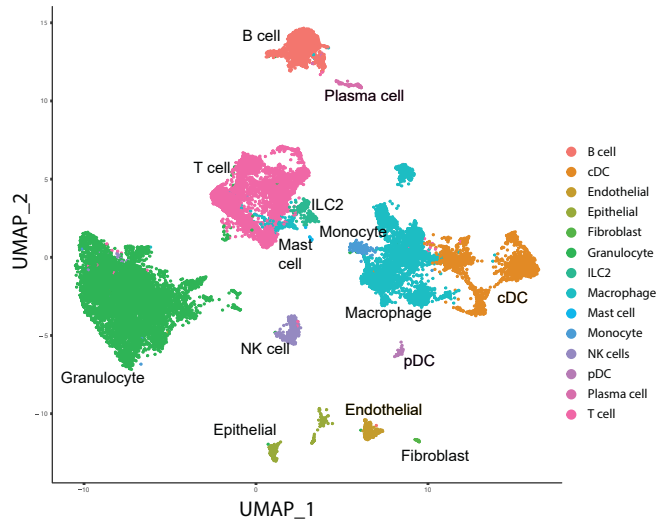**B**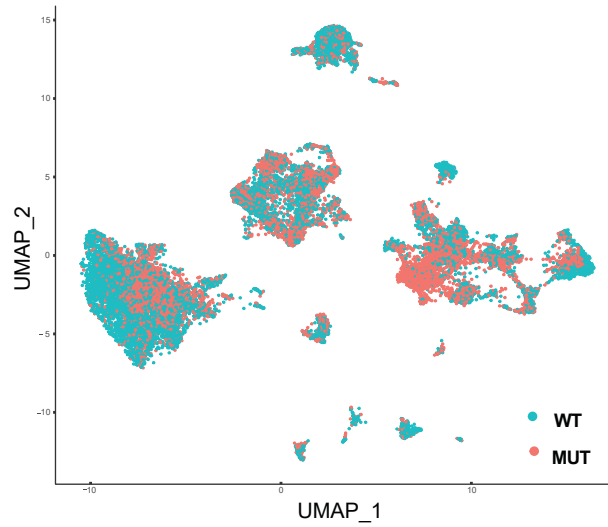**C**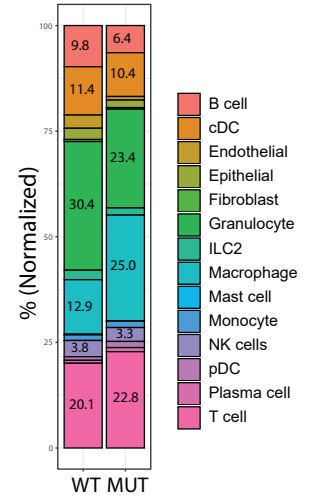**D**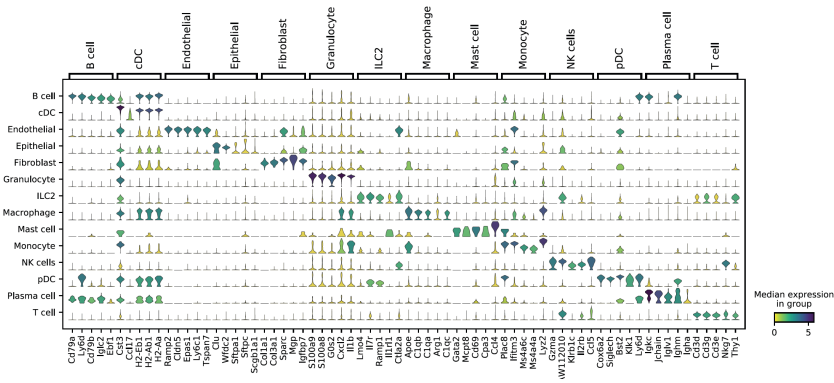**E**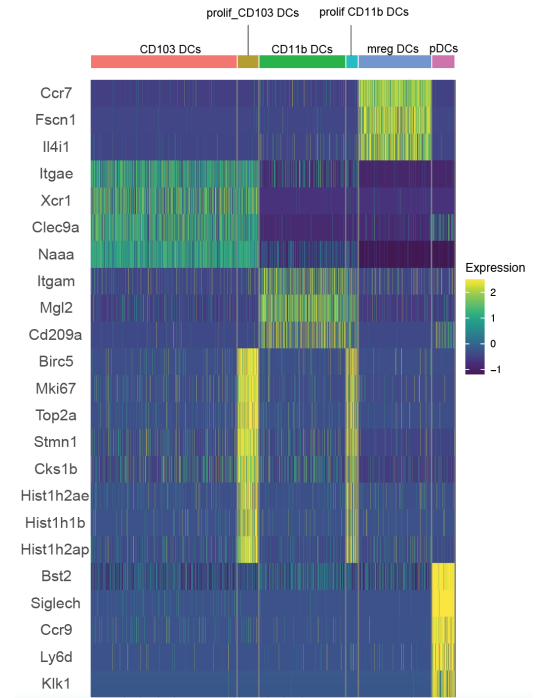

Fig S3

**Supplementary Fig 3: scRNA-seq of orthotopic *Keap1* wild-type and mutant tumors.**

(A) UMAP visualization of the different immune cell lineages identified by scRNA-seq, clustered and colored by cell type. Clusters identified based on gene expression. (B) UMAP representation of the distribution of immune cell lineages in *Keap1* wild-type (WT, blue) and mutant (MUT, red) lung tumors. (C) Bar plot showing distribution of the immune cell subsets in *Keap1* wild-type and mutant mouse lung tumors. (D) Stacked violin plots depicting the top 5 differentially expressed genes in each cluster shown in A. (E) Heatmap showing unique molecular identified (UMI) counts of selected bona fide genes with key indicating cell type of origin.

**A****Myeloid Gating Panel**

Gated on live and singlets

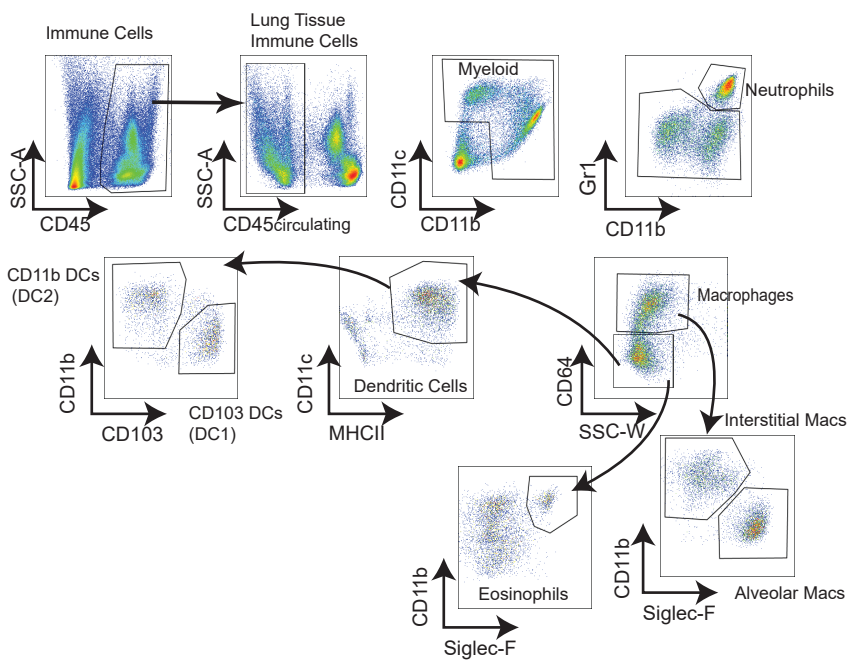**B**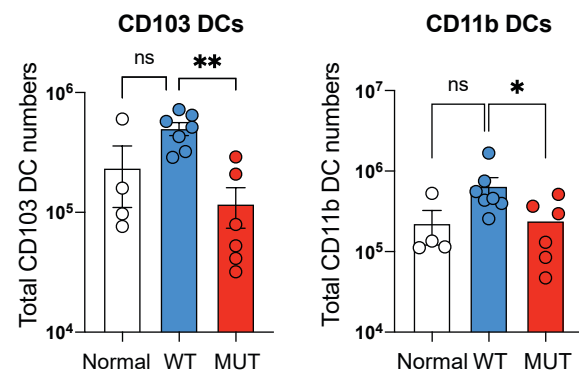**C**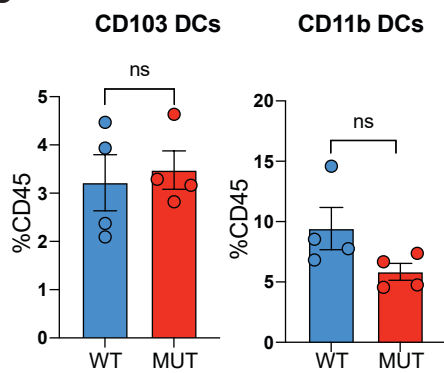**D**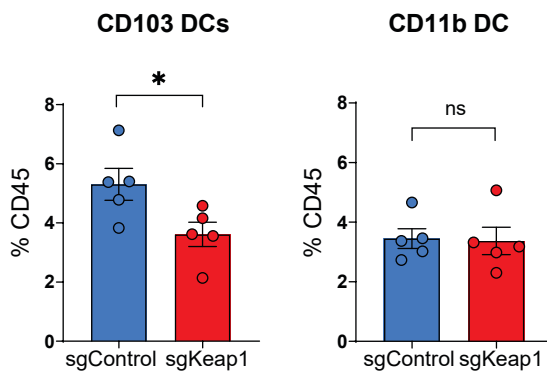



**Supplementary Fig 4: Impact of *Keap1* loss on Dendritic Cells.** (A) Gating strategy for myeloid cell lineage. (B) Total cell numbers of CD103 and CD11b dendritic cells in healthy non-tumor bearing (Normal) lungs and lungs with orthotopic *Keap1* wild-type (WT) and mutant (MUT) tumors. Each symbol represents an individual mouse. (C, D) Analysis of orthotopic tumors showing percentage of CD103 and CD11b DCs out of total tissue-infiltrating immune cells (CD45<sup>+</sup>CD45<sup>circ-</sup>) in *Keap1* wild-type and mutant tumors established in male hosts (C) and *Keap1* knockout (*sgKeap1*) and controls established in female hosts (D) . \*P<0.05; \*\*P<0.01

**A**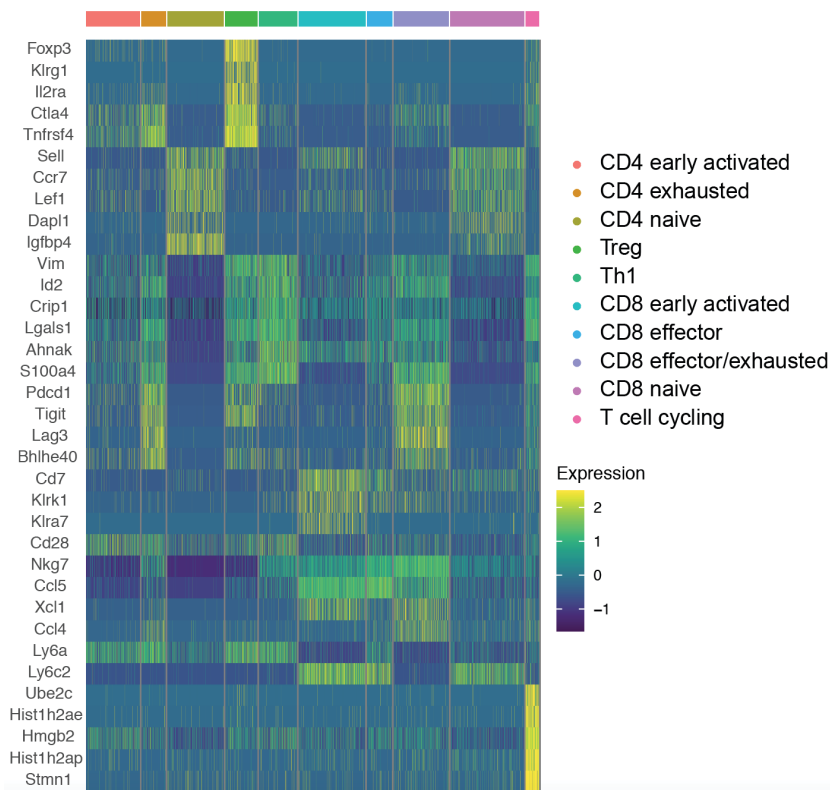**B**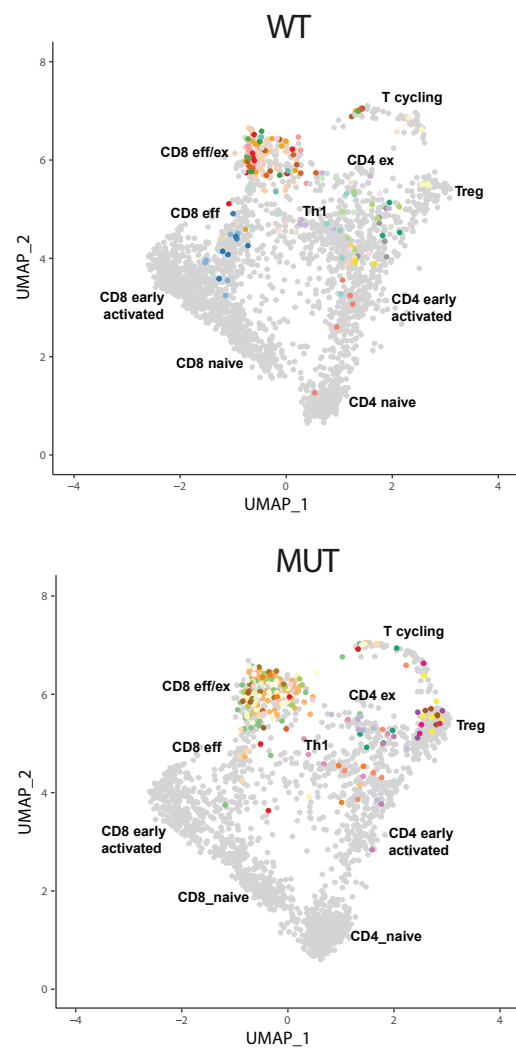

**Supplementary Fig 5: Single cell analysis identifies T cell subtypes and T cell clonality.** (A) Heat map shows normalized and log-transformed unique molecular identified (UMI) counts of selected genes, with key indicating T cell type. (B) UMAP visualization of TCR rearrangement on T cell subclusters of *Keap1* wild-type (WT) and mutant (MUT) tumors. Colored symbols indicate clonally expanded T cells while grey dots indicate polyclonal T cells or T cells that TCR was not reconstructed.

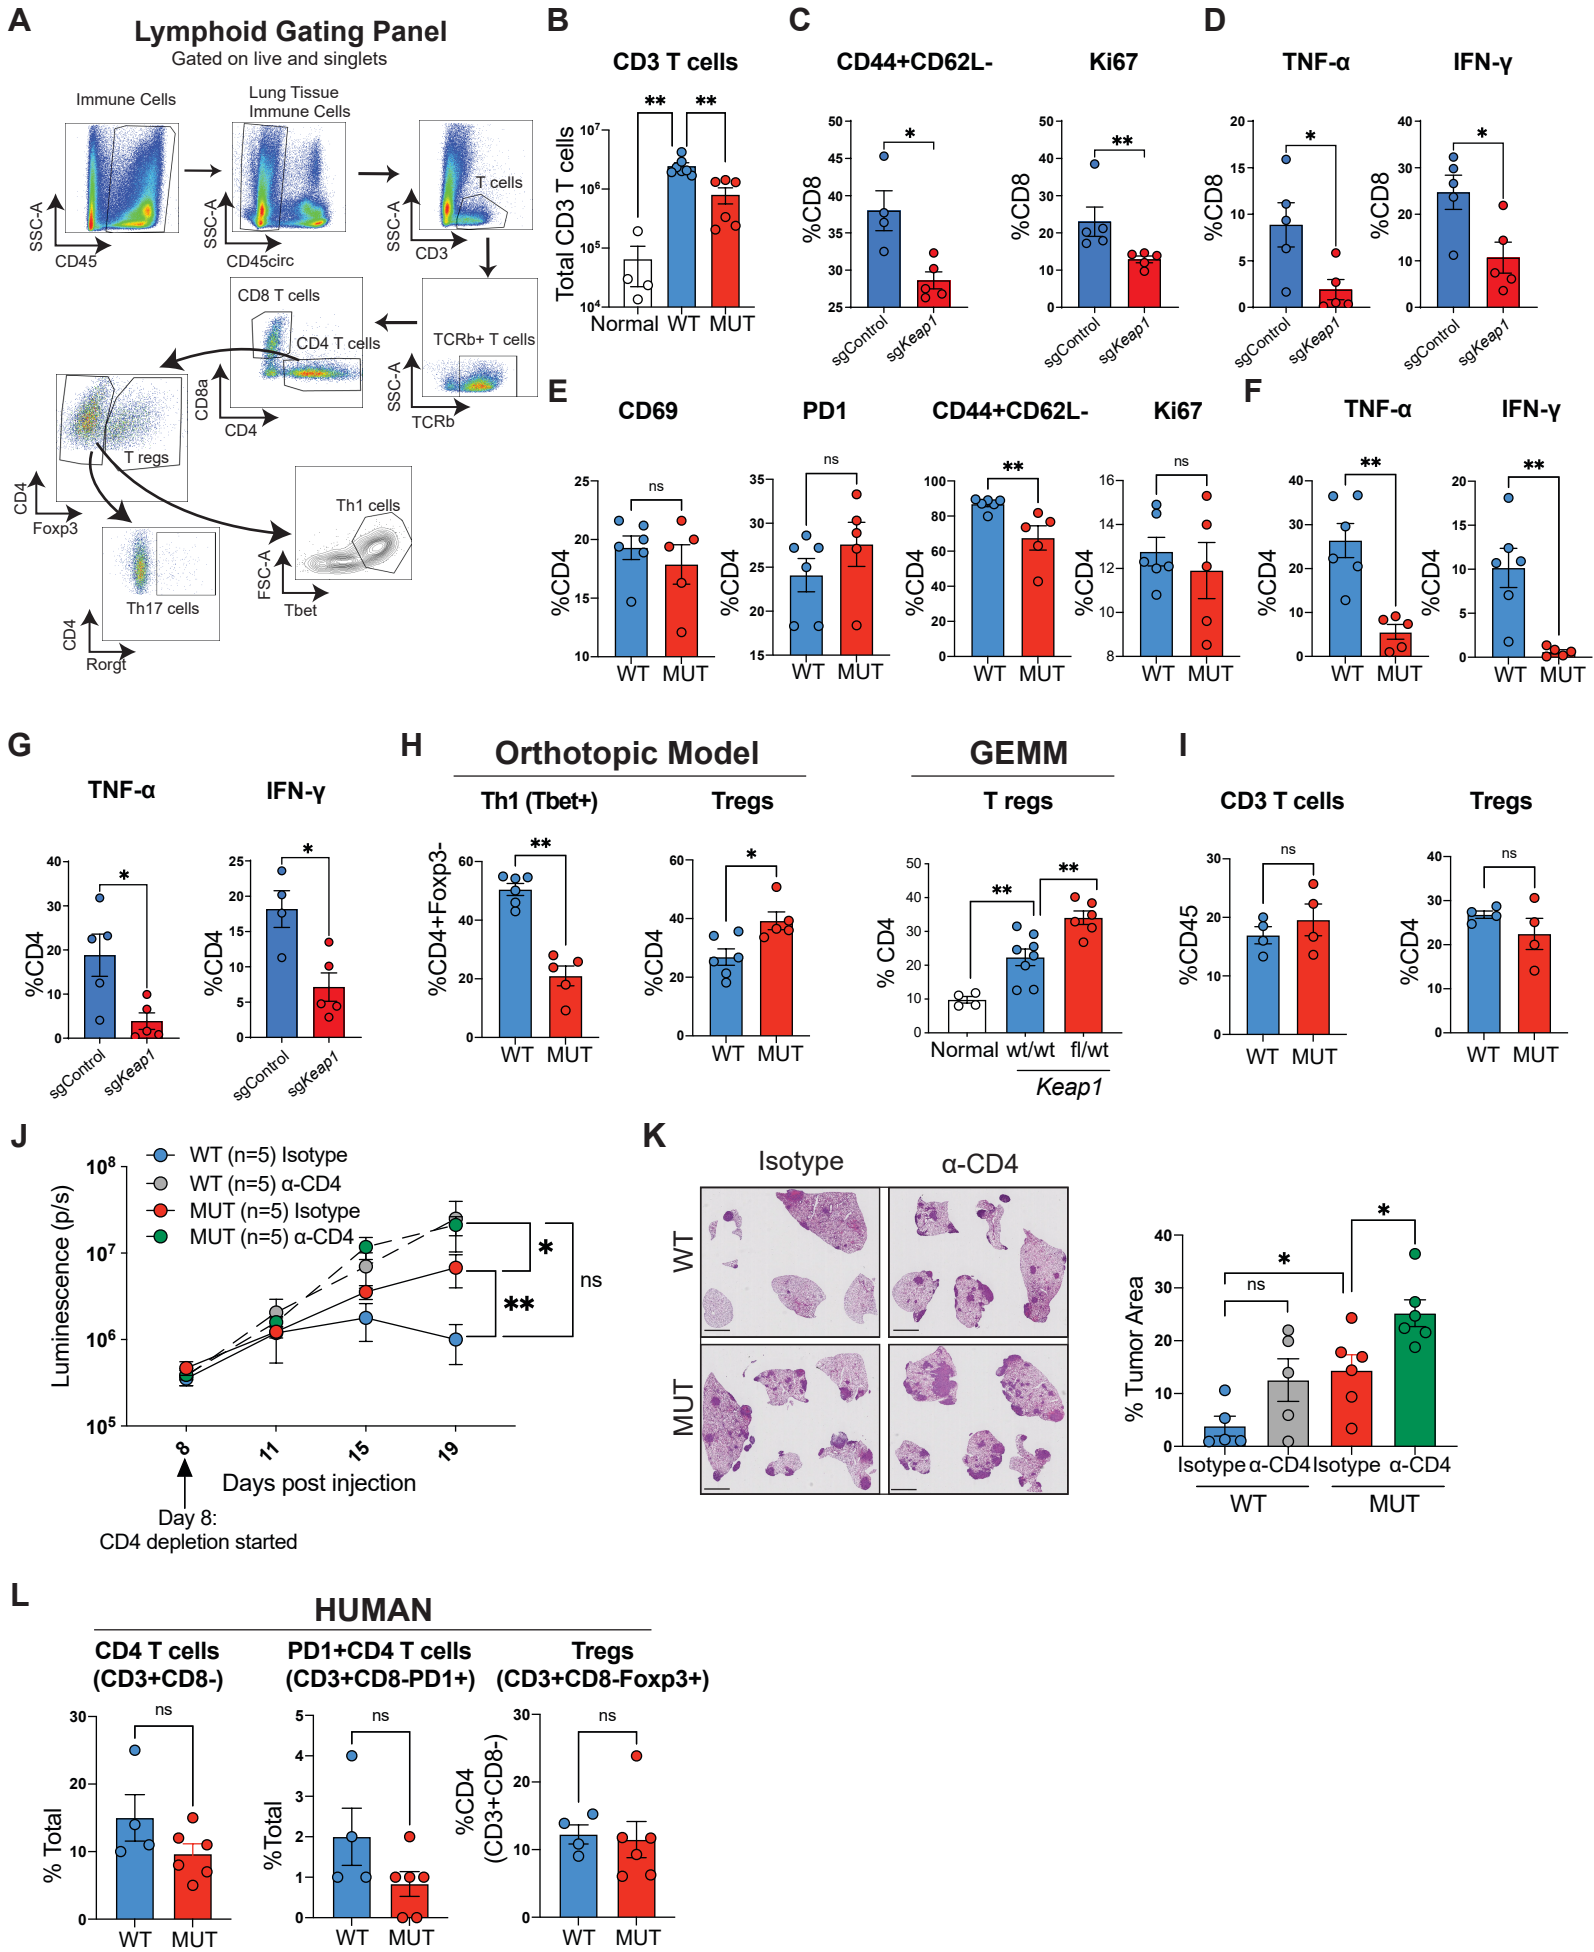

Fig. S6

### Supplementary Fig 6: *Keap1*-mutant tumors modulation of CD8 and CD4 anti-tumor immune responses

(A) Gating strategy for lymphoid lineage cells. (B) Total cell numbers of CD3 T cells in healthy (non-tumor bearing) lungs and lungs with orthotopic *Keap1* wild-type (WT) and mutant (MUT) tumors. Each symbol represents an individual mouse. (C, D) Percentage of CD44+CD62L- (C), Ki67 (C), TNF- $\alpha$  (D), and IFN- $\gamma$  (D) expression among CD8 T cells in *Keap1* knockout (*sgKeap1*) tumors compared to controls. Each symbol represents an individual mouse. (E) Percentage of CD69, PD1, CD44+CD62L-, and Ki67 lymphocytes among CD4 T cells in wild-type and mutant *Keap1* tumors. Each symbol represents an individual mouse. Each experimental subgroup had  $n \geq 5$  mice. (F, G) Percentage of intracellular IFN- $\gamma$  and TNF- $\alpha$  positive cells among the CD4 T lymphocytes in wild-type and *Keap1*-mutant tumors (F) and *Keap1* knockout (*sgKeap1*) tumors and controls (G). Each symbol represents an individual mouse. (H) Percentage of Th1(Tbet+) cells (out of CD4+Foxp3-) and Tregs (out of CD4 T cells) in wild-type and *Keap1*-mutant tumors or autochthonous genetically engineered mouse model (GEMM) *Keap1*<sup>+/+</sup> and *Keap1*<sup>fl/+</sup> tumors. Each symbol represents an individual mouse. (I) Percentages of T cells (out of total immune cells) and T regs (out of CD4 T cells) in orthotopic *Keap1* wild-type and mutant tumors established in male hosts. Each symbol represents an individual mouse. (J) Growth kinetics of *Keap1* wild-type and mutant tumors in female hosts upon antibody-mediated CD4 T cell depletion. Depletion was initiated at Day 8 after verifying tumor engraftment and continued until experimental endpoint. Right: Endpoint luminescence for experiment on the left. Each symbol represents an individual mouse. (K) Representative images of lung tumor burden and quantification (tumor area/total lung area) by H&E staining. Scale bars are 2 mm. (L) Quantification of Th cells (CD3+CD8-), PD1+ Th cells (CD3+CD8-PD1+) and Tregs (CD3+CD8-Foxp3+) in *KEAP1* wild-type and mutant human tumors. Tumor area was identified based on H&E staining. \*P<0.05; \*\*P<0.01

**A**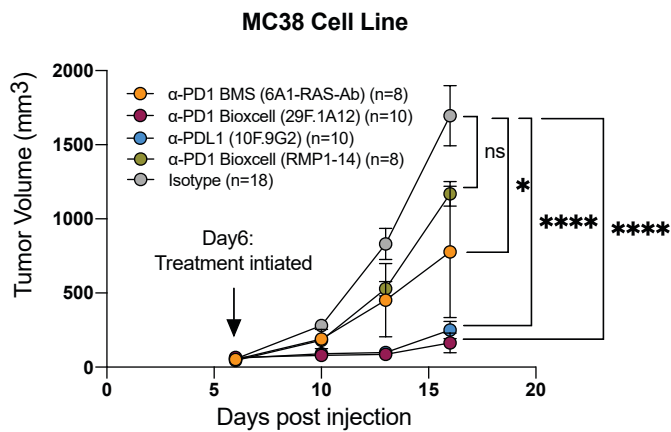**B**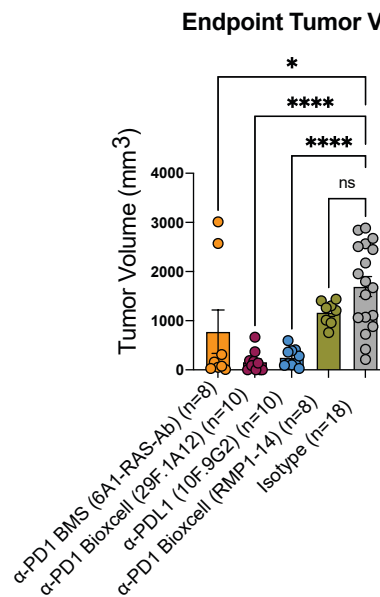**C**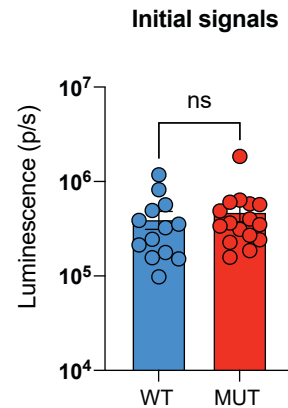**D**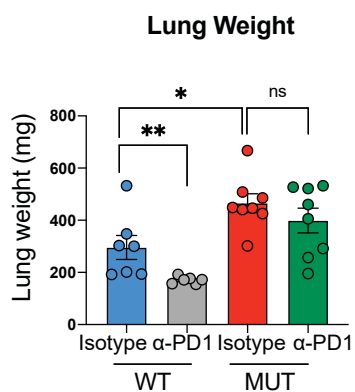**E**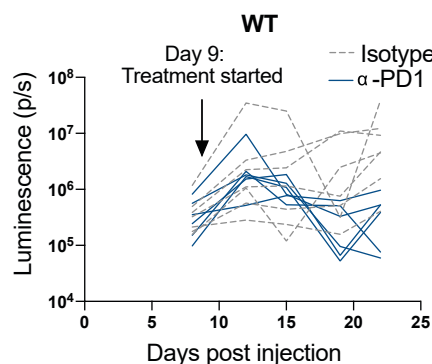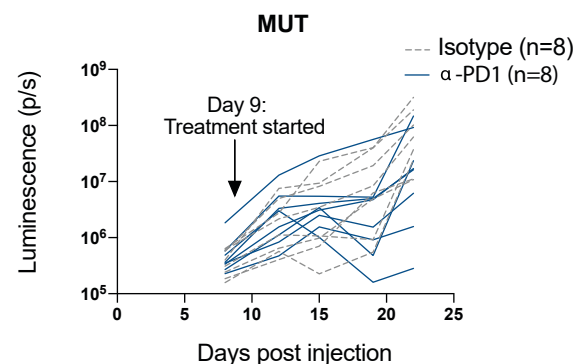**F**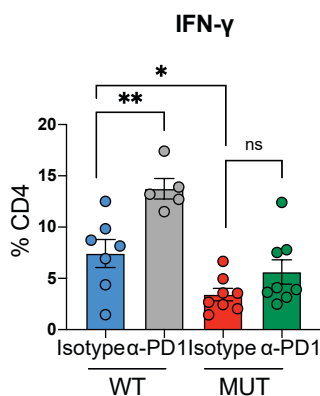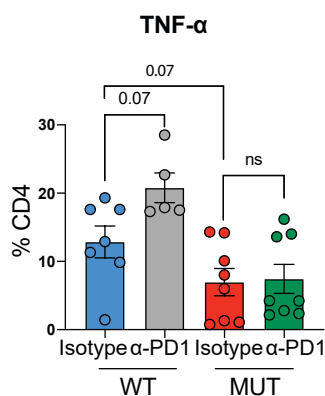

**Supplementary Fig 7: Immune checkpoint blockade therapy in syngeneic mouse models.**

(A) Optimization of immune checkpoint blockade (ICB) antibodies in MC38 colon adenocarcinoma tumors. Tumor growth of MC38 cells subcutaneously injected in the right and left flanks of C57BL/6J mice was measured following treatment with various widely used immune checkpoint inhibitors. Treatment for all antibodies was initiated on Day 6, and continued until experimental endpoint, except for anti-PDL1 which was administered for a total of 3 doses. For isotype control, mice treated with various isotypes were pooled together as no differences were observed between the different isotype control antibody injections. Experimental subgroups treated with an anti-PD1 antibody or anti-PDL1 had  $\geq 5$  mice. Experimental subgroups treated with isotype control antibody had at least  $n \geq 3$  mice. (B) Tumor volume at endpoint for the experiment in A. Each symbol represents an individual tumor. (C) Luminescence signals 24hrs prior to a-PD1 treatment initiation of *Keap1* wild-type (WT) and mutant (MUT) KP lung tumors shown in Fig. 4A. Each symbol represents an individual mouse. (D) Lung weight as proxy for tumor burden in mice bearing *Keap1* wild-type and mutant tumors treated with isotype control or anti-PD1. Each experimental subgroup had  $n \geq 6$  mice. Each symbol represents an individual mouse. (E) ICB responses in individual mice for data shown in Fig. 4A. (F) Percentage of intracellular IFN- $\gamma$  and TNF- $\alpha$  positive T cells among the CD4 T cells in the wild-type and mutant *Keap1* tumors treated with anti-PD1 or isotype control. Each symbol represents an individual mouse. Each experimental subgroup had  $n \geq 5$  mice. \* $P < 0.05$ ; \*\* $P < 0.01$ ; \*\*\*\* $P < 0.0001$

**A**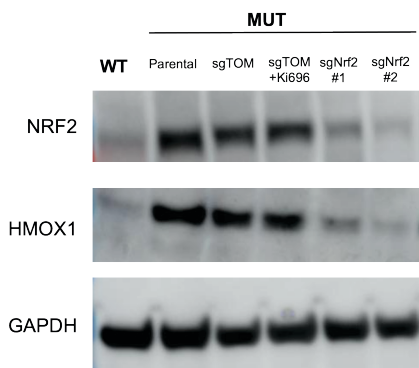**B**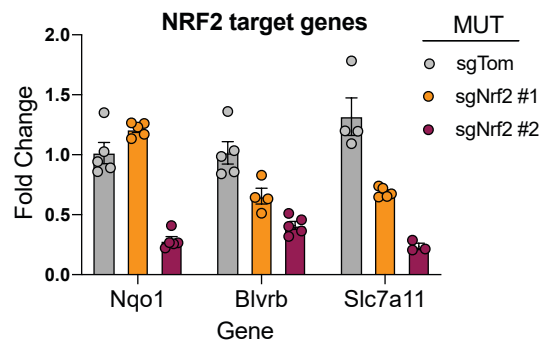**C**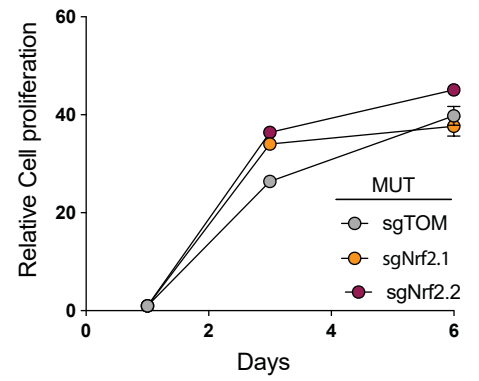**D**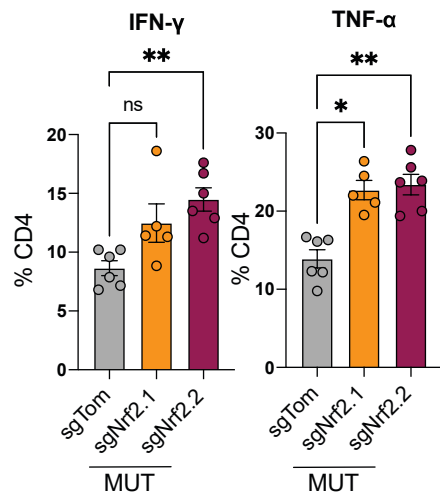**E**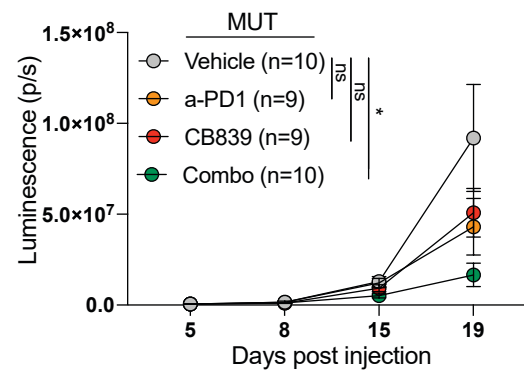



**Supplementary Fig 8: Validation of *Nrf2*-deficient *Keap1*-mutant cells and synergy of glutamine modulation with ICB in *Keap1*-mutant tumors.** (A) Western blot showing NRF2 and HMOX1, an NRF2 target gene, in *Keap1*-mutant (MUT) KP cells transduced with control sgTomato guide or two guides targeting *Nrf2*. Guides targeting *Nrf2* were validated. *Keap1* wild-type KP cell line (WT) was used as a control for low expression of NRF2 and HMOX1 while Ki696 small molecule NRF2 activator was used as positive control. GAPDH was used as a loading control. (B) Gene expression of NRF2 target genes in *Keap1*-mutant KP cells wild-type or deficient for *Nrf2*. (C) *In vitro* proliferation analysis of KP cell lines transduced with control guide against Tomato (sgTom) or against *Nrf2* gene (sgNrf2.1, sgNrf2.2) reveals no difference in growth kinetics. (D) Percentage of intracellular IFN- $\gamma$  and TNF- $\alpha$  positive cells among the CD4 T lymphocytes. Each symbol represents an individual mouse. Each experimental subgroup had  $n \geq 5$  mice. (E) Growth kinetics of *Keap1*-mutant lung orthotopic tumors in C57BL/6J female mice upon treatment of vehicle/isotype control, CB839,  $\alpha$ -PD1 or combination of CB-839 and  $\alpha$ -PD1. Tumor cells express luciferase enabling monitoring of tumor growth kinetics via luminescence \*P<0.05; \*\*P<0.01
